# Supplementary material for: Modulation of miRNA expression in natural populations of A. thaliana along a wide altitudinal gradient of Indian Himalayas
Source: PubMed Central journal article supplement (PMC6345966; doi:10.1038/s41598-018-37465-y), 2019-01-24
Supplement: 41598_2018_37465_MOESM1_ESM.pdf [file 41598_2018_37465_MOESM1_ESM.pdf]

**Modulation of miRNA expression in natural populations of *A. thaliana* along a wide altitudinal gradient of Indian Himalayas**

Abhinandan Mani Tripathi<sup>1,2</sup>, Akanksha Singh<sup>1,2</sup>, Rajneesh Singh<sup>1</sup>, Ashwani Kumar Verma<sup>1</sup>,  
Sribash Roy\*<sup>1,2</sup>

1. Division of Genetics and Molecular Biology, CSIR-National Botanical Research Institute, Rana Pratap Marg, Lucknow, Uttar Pradesh, India
2. Academy of Scientific and Innovative Research (AcSIR), Anusandhan Bhawan, 2 Rafi Marg, New Delhi, India

\* To whom correspondence should be addressed, E-mail: [sribashroy@nbri.res.in](mailto:sribashroy@nbri.res.in)

a

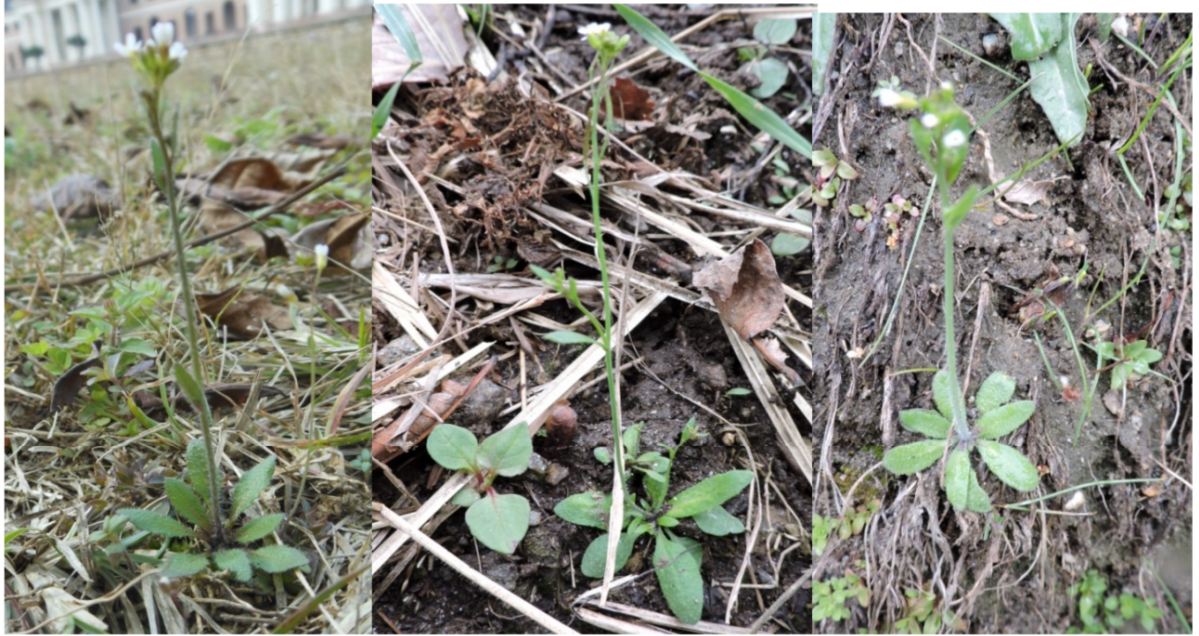

Deh

Mun

Chit

b

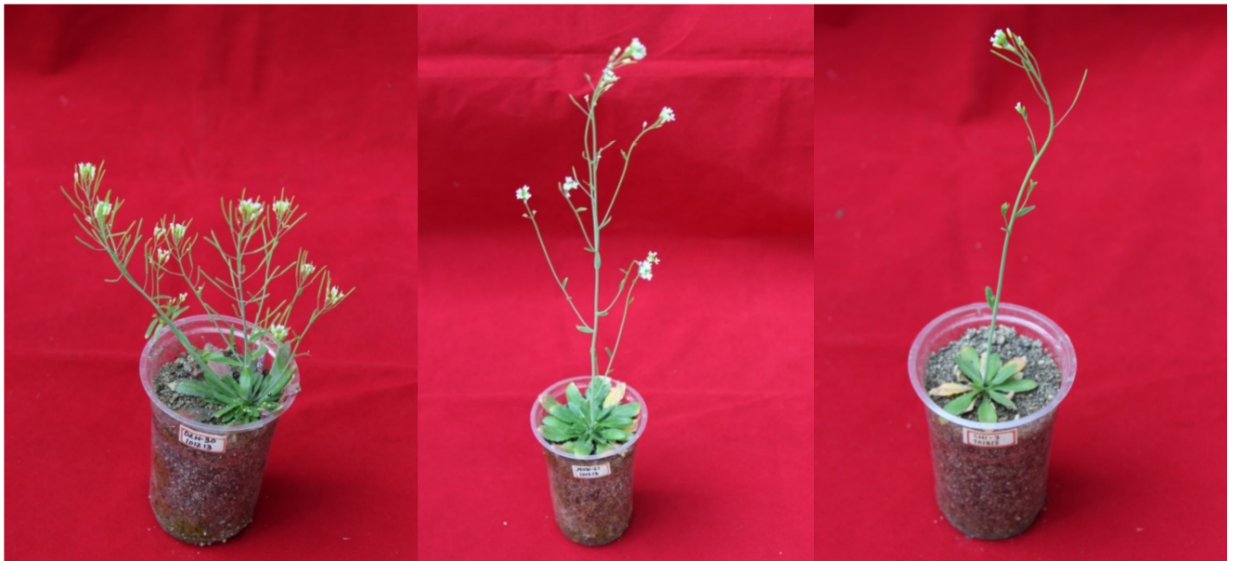

Deh

Mun

Chit

**Supporting Information Figure S1.** *Arabidopsis* plant of different populations growing in (a) Natural field condition (b) Glass-house condition.

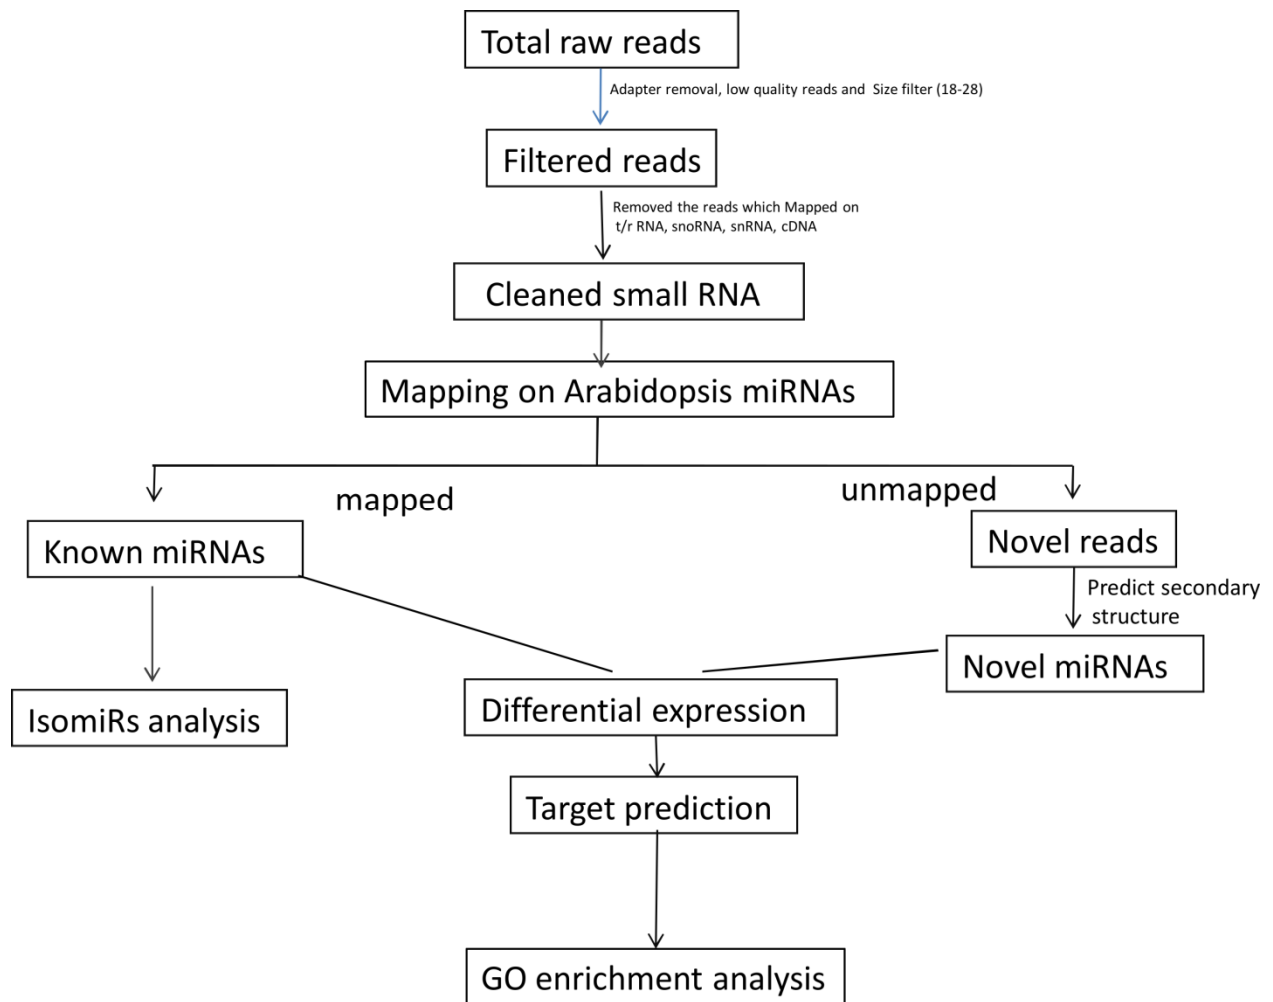

**Supporting Information Figure S2.** Schematic representation of small RNA analysis pipeline.

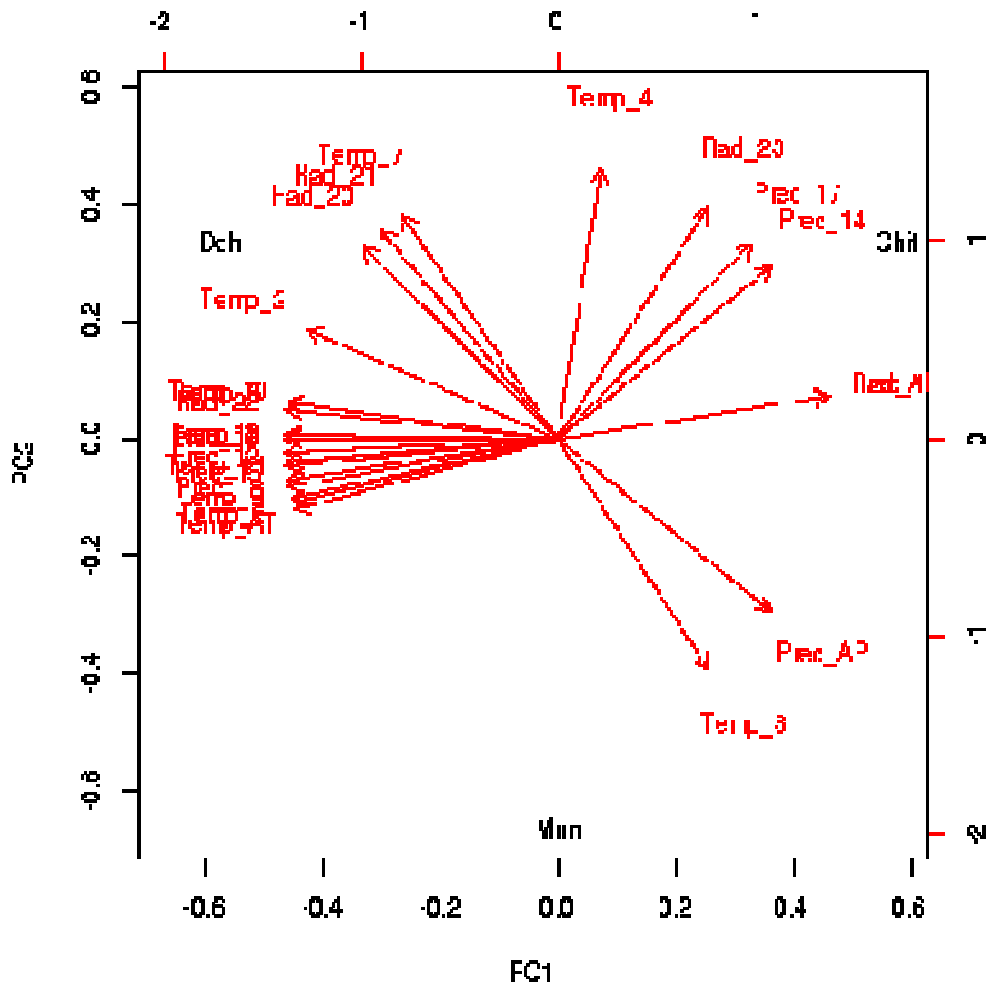

**Supporting Information Figure S3.** Principle component analysis (PCA) of different bioclimatic variables. The figure shows climatic differences among the sampling locations.

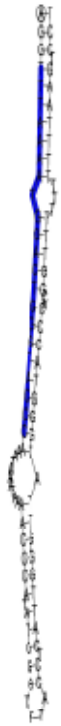

Novel 1

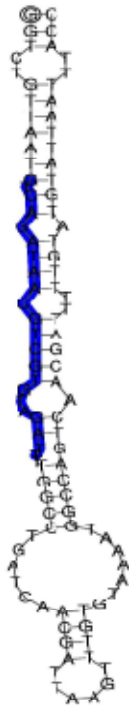

Novel 2

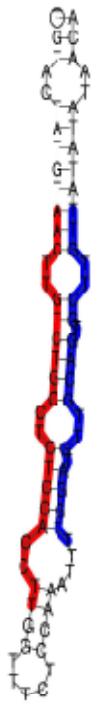

Novel 3

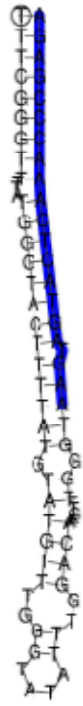

Novel 4

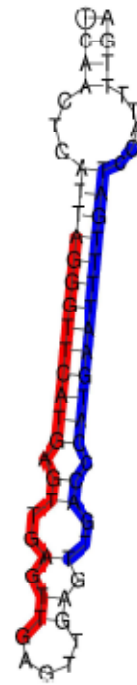

Novel 5

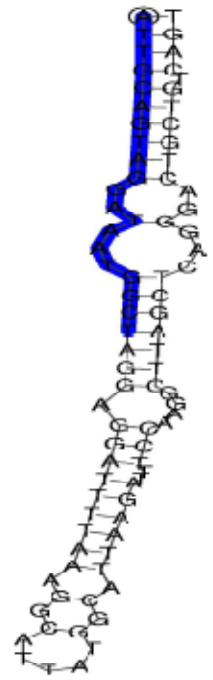

Novel 6

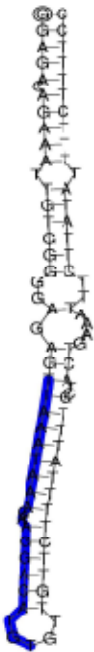

Novel 7

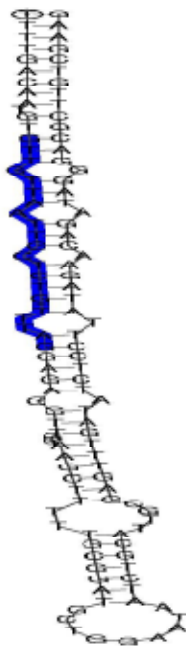

Novel 8

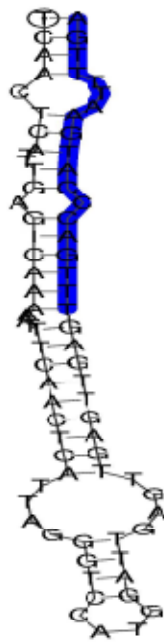

Novel 9

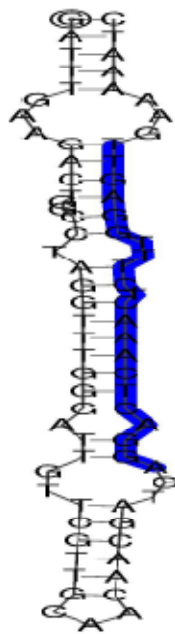

Novel 10

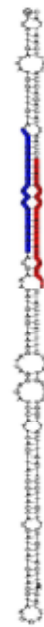

Novel 11

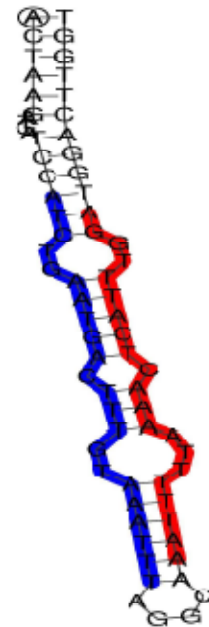

Novel 12

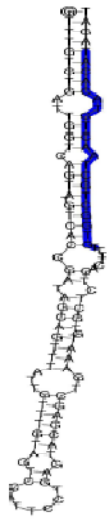

Noe1 13

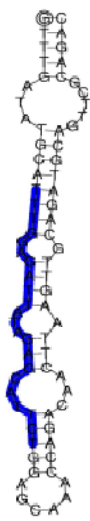

Novel 14

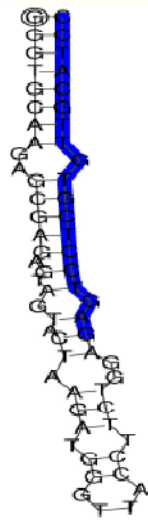

Novel 15

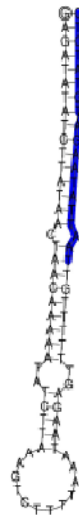

Novel 16

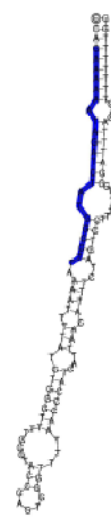

Novel 17

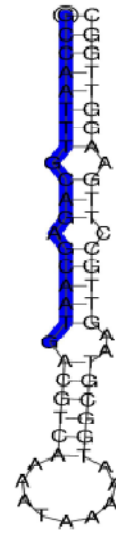

Novel 18

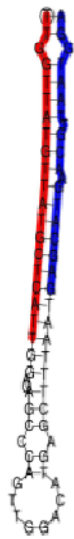

Noe1 19

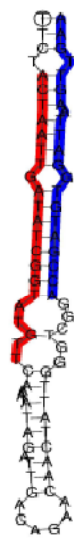

Novel 20

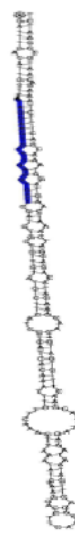

Novel 21

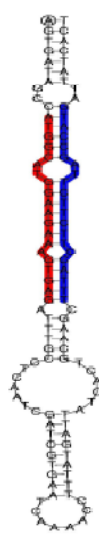

Novel 22

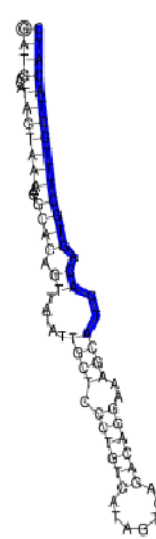

Novel 23

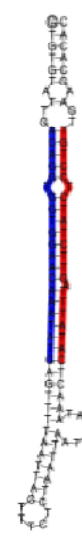

Novel 24

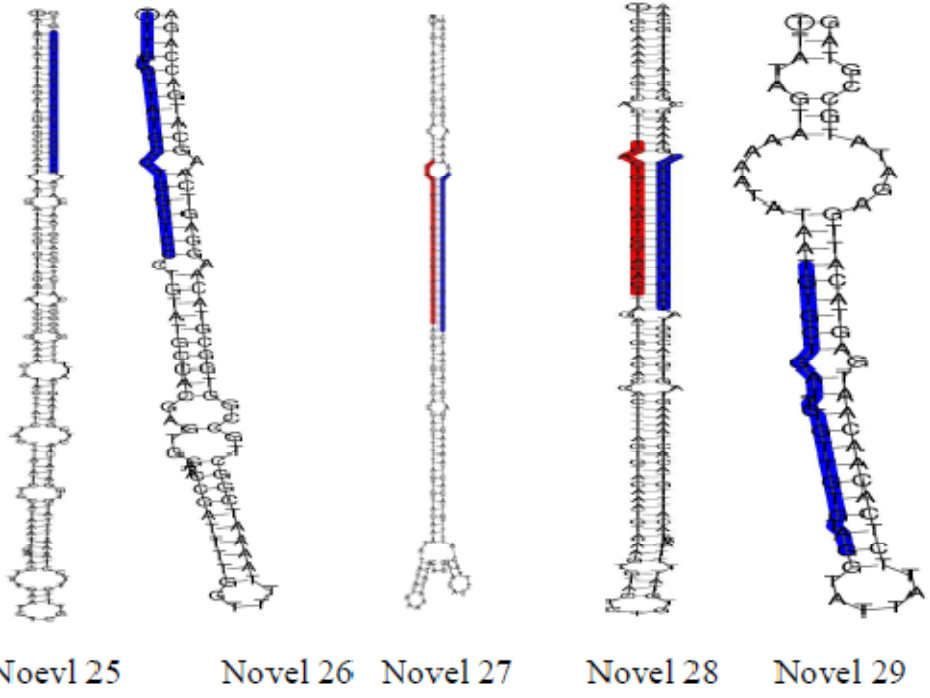

**Supporting Information Figure S4.** Secondary structure of novel miRNA identified in this study. Blue and red color on stem indicated the position miRNA/miRNA\*.

**a**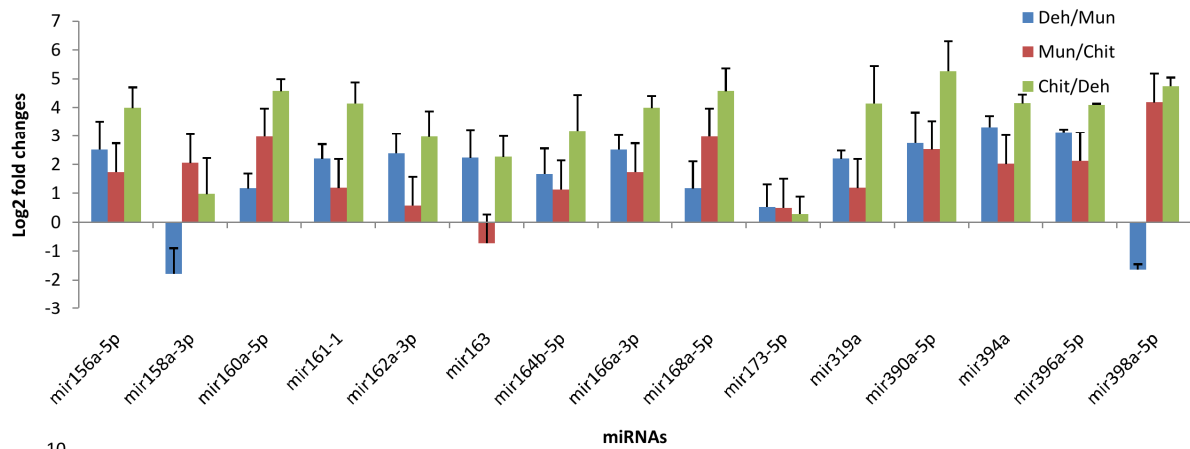**b**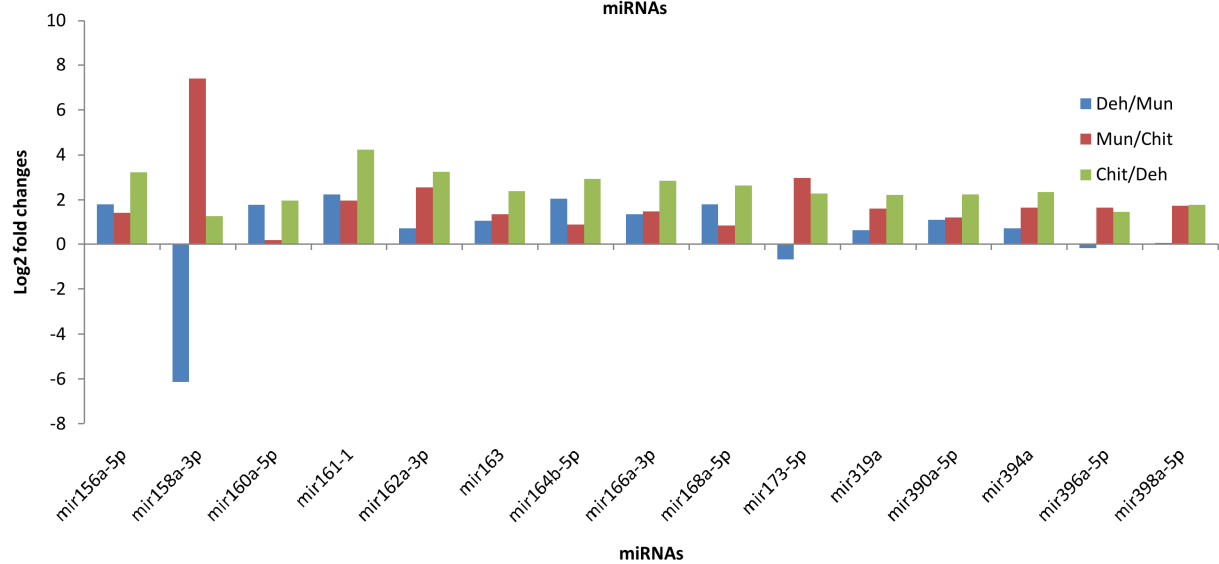

**Supporting Information Figure S5. Validation of expression pattern of differentially expressed miRNAs by stem loop qRT-PCR.** Expression pattern of randomly selected sixteen differentially expressed miRNAs between different population. (a) miRNA expression quantified by using stem-loop qRT-PCR, (b) miRNA expression measured from NGS data.



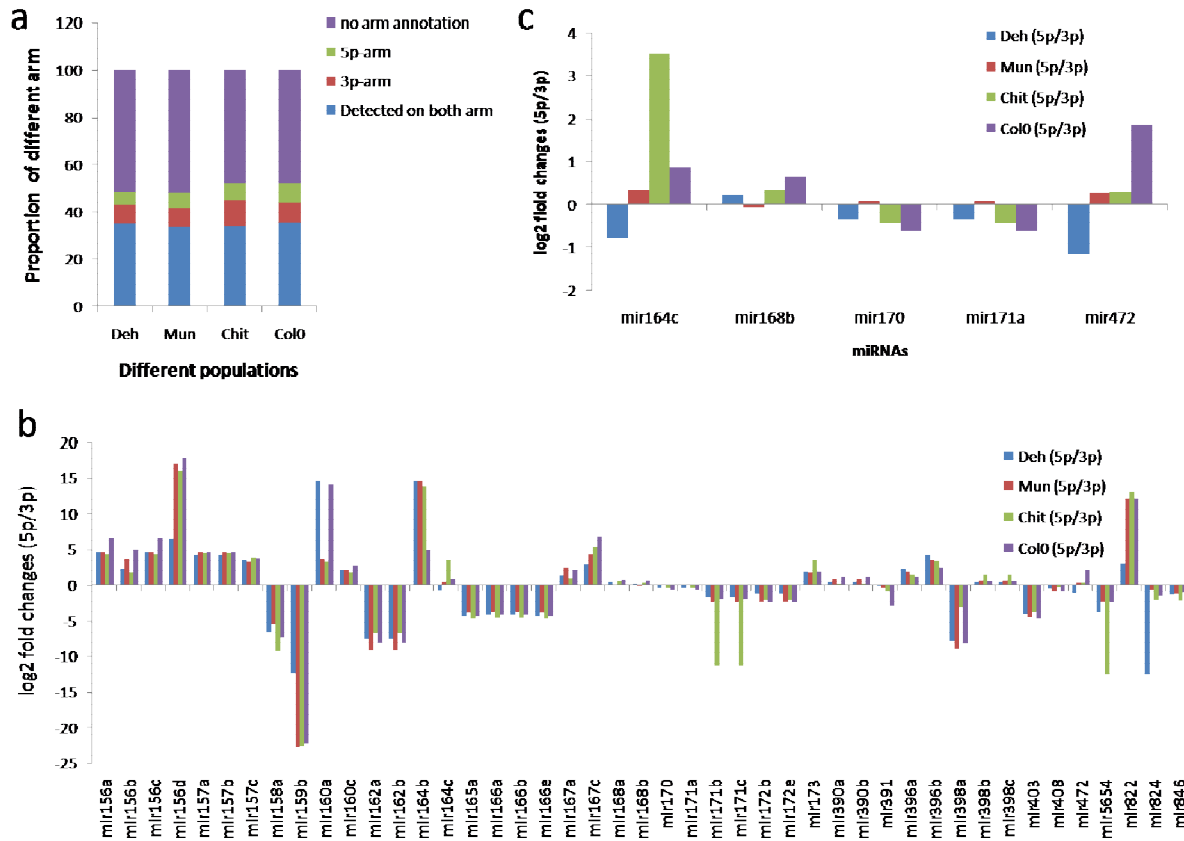

**Supporting Information Figure S6. Population wise changes in the arm expression of different miRNAs.** (a) Proportion of different arm of miRNA in different populations, (b) 5p/3p ratio of different arms in different populations (c) 5p/3p ratio of some miRNAs which showed contrasting difference in different populations.

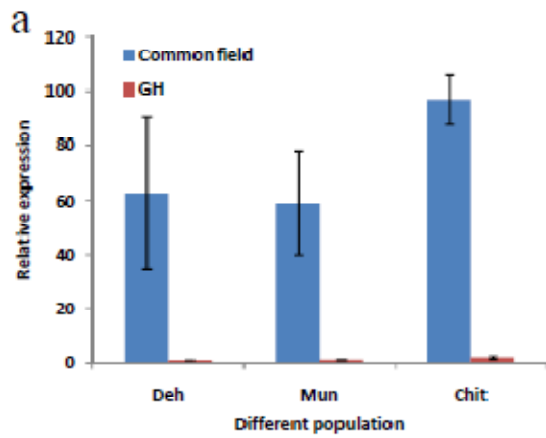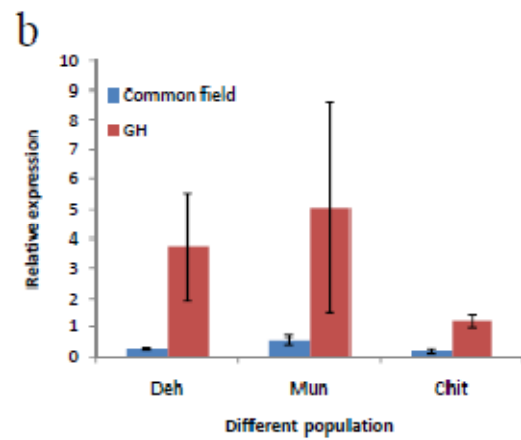

**Supporting Information Figure S7.** (a) Differential expression of miR858 and (b) miR397. The differential expression performed of the plant growing in common field condition by using stem loop qRT-PCR.

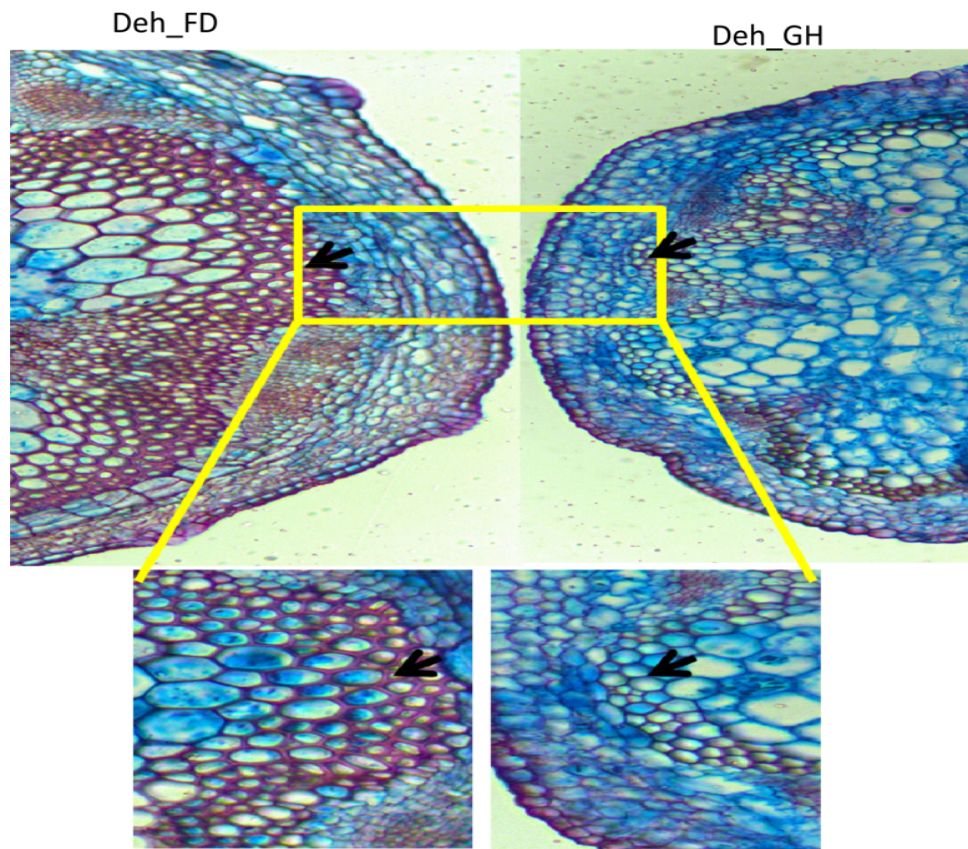

**Supporting Information Figure S8. Lignin quantification of field and glasshouse grown plant.** Lignin deposition was visualized under light microscope using safranin staining after cross-sectioning of stem. Dense color indicates higher lignin (indicated by arrow) in FD samples and lighter color indicates lower lignin deposition in GH samples.

a

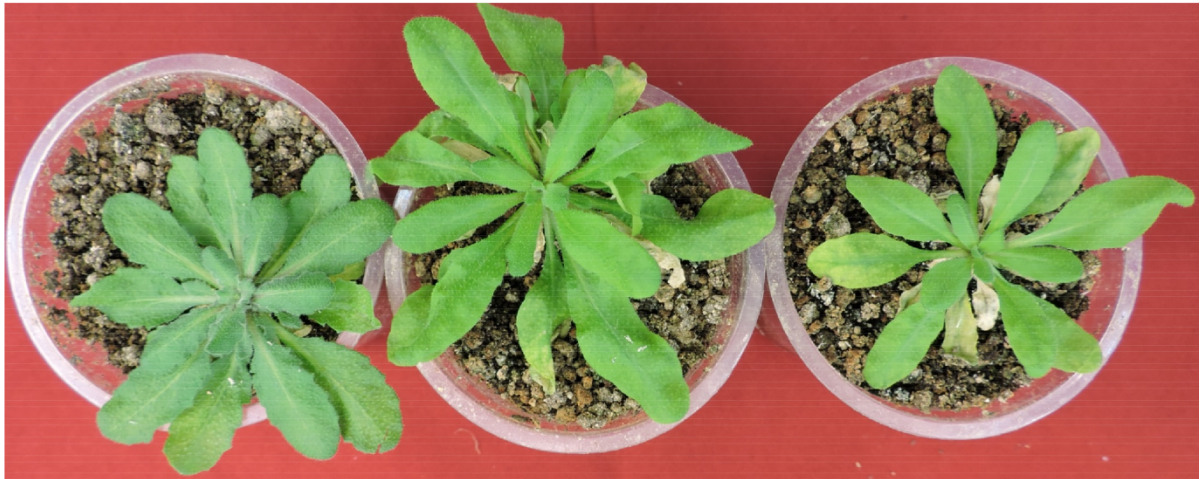

b

Deh

Mun

Chit

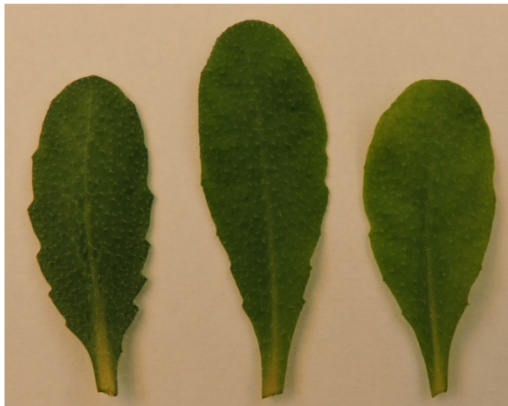

Deh

Mun

Chit

**Supporting Information Figure S9.** Photograph indicating the contrasting leaf serration in different populations.

## **Supporting Information Legends**

**Supporting Information Table S1.** List of primers sequences that were used in this study.

**Supporting Information Table S2. Interpolated bioclimatic data:** 26 bio-climatic variables derived from monthly mean data of the four population sites. The table includes three seasonal variables derived for this study (highlighted in yellow).

**Supporting Information Table S3.** Categorization and abundance different small RNAs from different libraries.

**Supporting Information Table S4.** The table includes different numbers of miRNA that were identified in this study.

**Supporting Information Table S5.** Calculation of Jaccard Similarity Index in different comparisons

**Supporting Information Table S6.** Differentially expressed miRNAs in different comparisons.

**Supporting Information Table S7.** List of miRNAs which expression either increases or decreases as altitude increases.

**Supporting Information Table S8.** ANOVA with miRNA expression was performed to find the significance of miRNA expression in the three populations of *Arabidopsis thaliana* grown in the two environmental conditions independently. Significant trait differentiation values are in italics ( $P < 0.05$ ).

**Supporting Information Table S9.** The target of high altitude associated miRNAs and their differential expression.

**Supporting Information Table S10. Correlation between miRNA expression bioclimatic variables.** Correlation between miRNA expression and average temperature (AT), average precipitation (AP) and average radiation (AR) of growing season was calculated (r-values larger than the threshold (0.98) and P-value  $> 0.05$ ).

**Supporting Information Table S11. Putative new miRNAs predicted in this study by miRCat algorithms.** The detailed parameter of predicted novel miRNA like their free energy, precursor length, abundance, sequence and genomic location are provided.

**Supporting Information Table S12.** The table includes expression abundant of novel miRNA and Indian *Arabidopsis*-specific novel miRNA.

**Supporting Information Table S13.** Two-way ANOVA was performed on plant morphology of UV-B treated plants. Two-way ANOVA was performed with population, UV treatment and their interaction as factors.
